# Supplementary material for: Functional characterization of phospholipase C-γ2 mutant protein causing both somatic ibrutinib resistance and a germline monogenic autoinflammatory disorder
Source: PubMed Central journal article supplement (PMC6188132; doi:10.18632/oncotarget.26173), 2018-09-28
Supplement: oncotarget-09-34357-s001.pdf [file oncotarget-09-34357-s001.pdf]

## Functional characterization of phospholipase C- $\gamma_2$ mutant protein causing both somatic ibrutinib resistance and a germline monogenic autoinflammatory disorder

### SUPPLEMENTARY MATERIALS

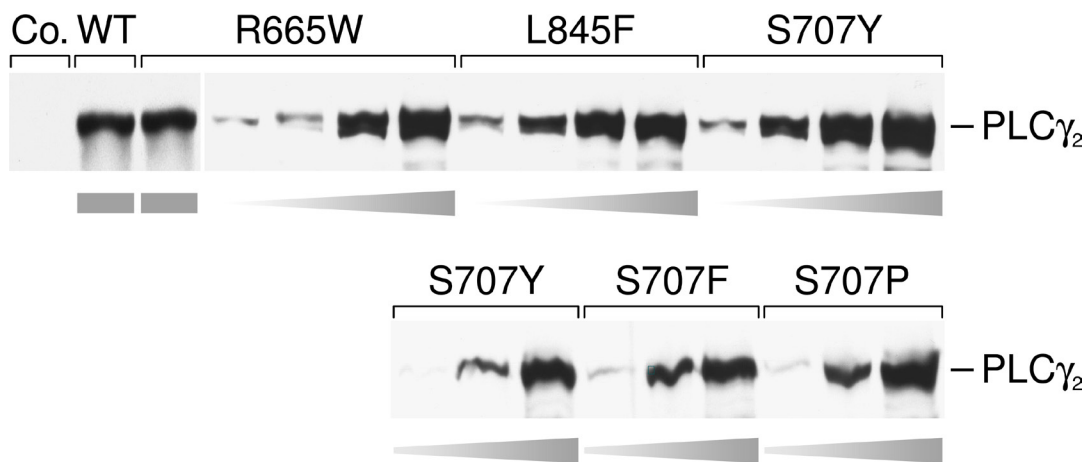

**Supplementary Figure 1: Expression of wild-type and mutant PLC $\gamma_2$  isozymes in the experiment shown in Figure 1.** Cells from one well each were washed with 0.2 ml of Dulbecco's PBS and then lysed by addition of 100  $\mu$ l of SDS-PAGE sample preparation buffer. Aliquots of the samples were subjected to SDS-PAGE and immunoblotting was performed using an antibody reactive against the c-Myc epitope present on wild-type and mutant PLC $\gamma_2$ .

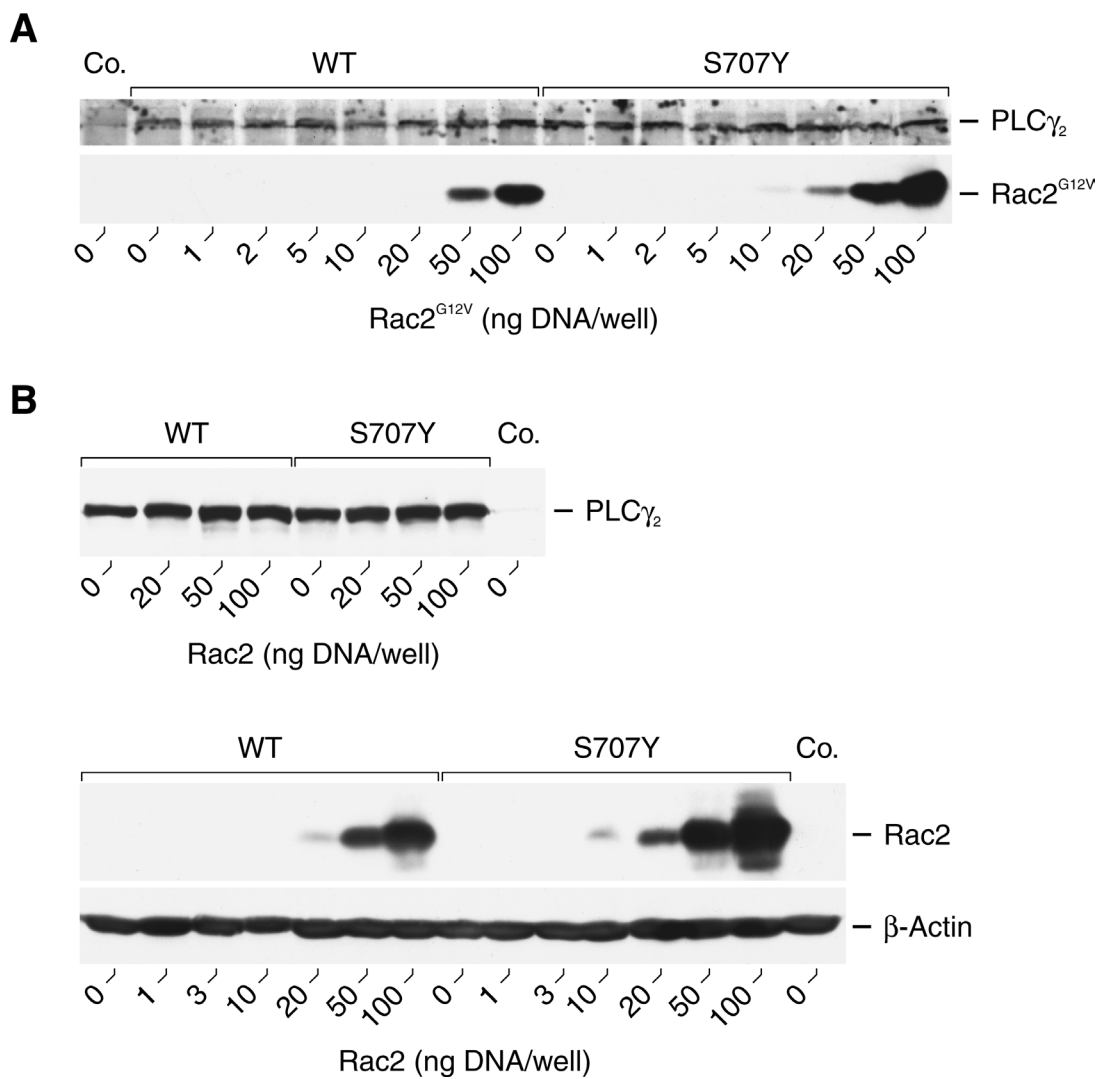

**Supplementary Figure 2: Expression of wild-type and mutant PLC $\gamma_2$  isoforms and Rac2 in the experiment shown in Figure 2.** Cells from one well each were analyzed by SDS-PAGE and immunoblotting using an antibody reactive against the c-Myc epitope, antibody reactive against Rac2 or  $\beta$ -actin. *Co.*, control.

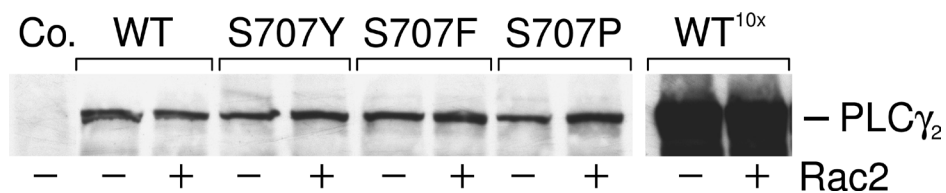

**Supplementary Figure 3: Expression of wild-type and mutant PLC $\gamma_2$  isoforms in the experiment shown in Figure 3.** Cells from one well each were analyzed by SDS-PAGE and immunoblotting using an antibody reactive against the c-Myc epitope.

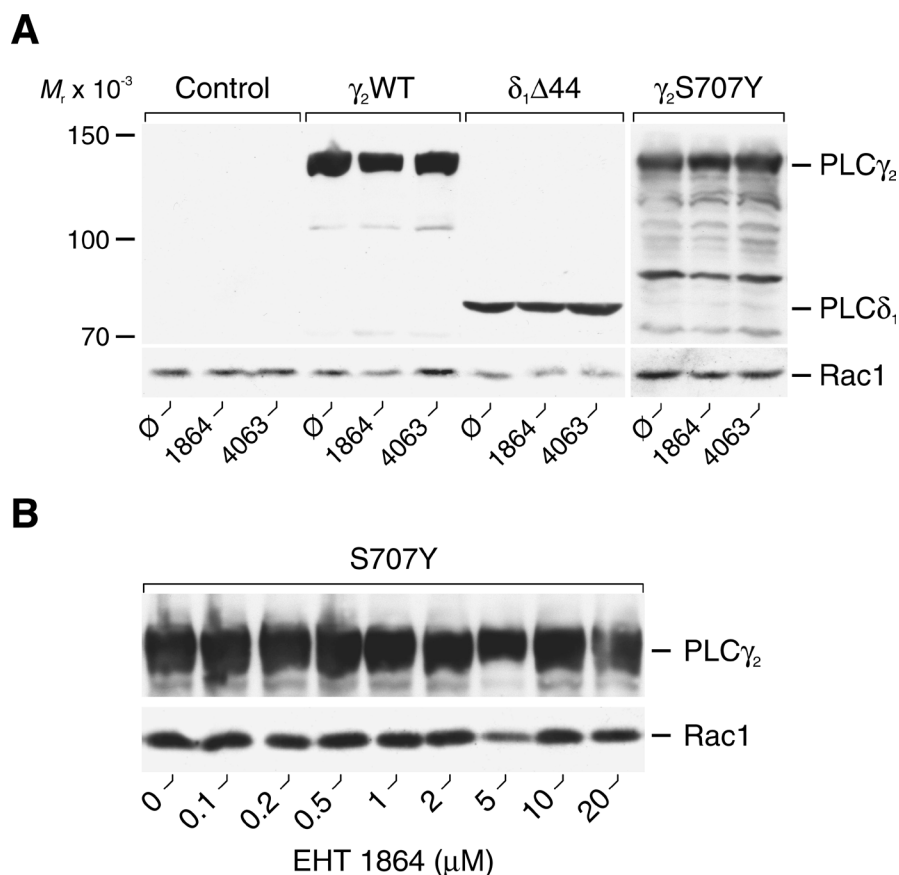

**Supplementary Figure 4: Expression of exogenous wild-type and mutant PLC $\gamma_2$  isoforms, PLC $\delta_1\Delta 44$  and endogenous Rac1 in the experiment shown in Figure 4.** Cells from one well each were analyzed by SDS-PAGE and immunoblotting using an antibody reactive against the c-Myc epitope present on wild-type and mutant PLC $\gamma_2$  as well as on PLC $\delta_1\Delta 44$  or antibody reactive against Rac1 endogenously present in COS-7 cells.

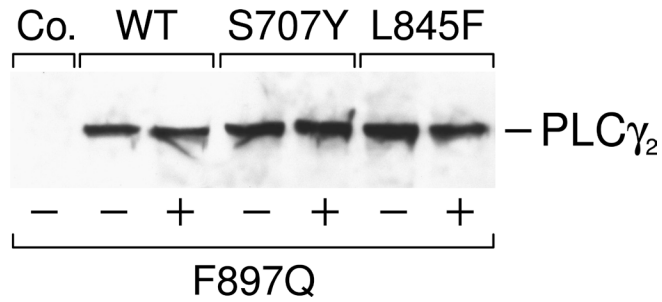

**Supplementary Figure 5: Expression of wild-type and mutant PLC $\gamma_2$  isozymes in the experiment shown in Figure 5.** Cells from one well each were analyzed by SDS-PAGE and immunoblotting using an antibody reactive against the c-Myc epitope.

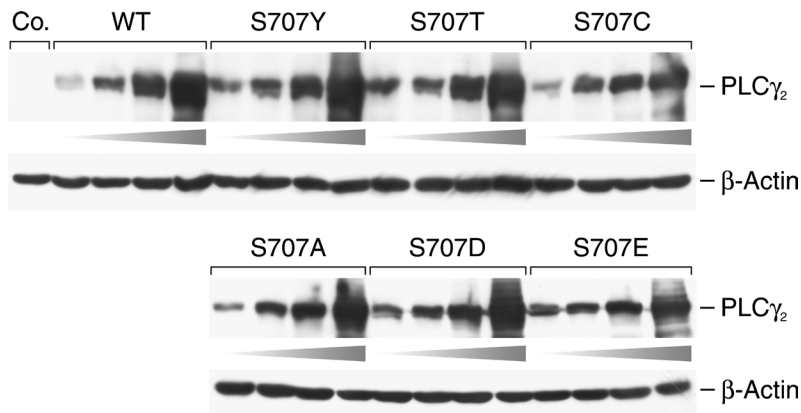

**Supplementary Figure 6: Expression of wild-type and mutant PLC $\gamma_2$  isozymes in the experiment shown in Figure 7.** Cells from one well each were analyzed by SDS-PAGE and immunoblotting using an antibody reactive against the c-Myc epitope present on wild-type and mutant PLC $\gamma_2$  or antibody reactive against  $\beta$ -actin.

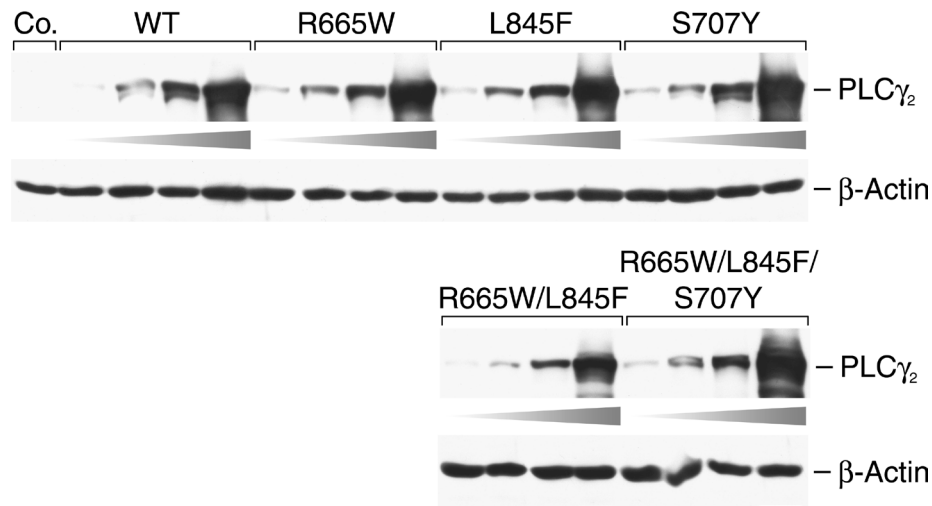

**Supplementary Figure 7: Expression of wild-type and mutant PLC $\gamma_2$  isozymes in the experiment shown in Figure 8.** Cells from one well each were analyzed by SDS-PAGE and immunoblotting using an antibody reactive against the c-Myc epitope present on wild-type and mutant PLC $\gamma_2$  or antibody reactive against  $\beta$ -actin.

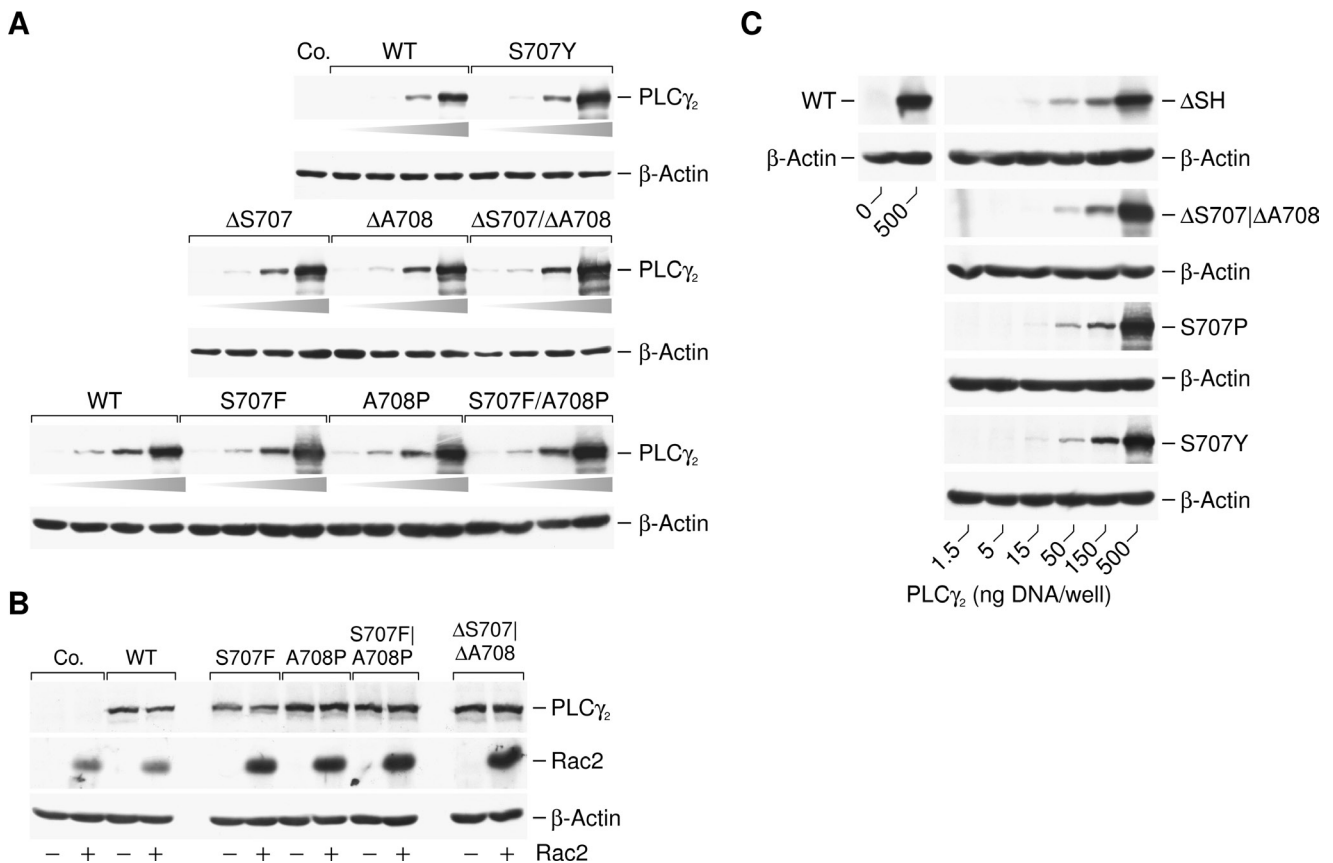

**Supplementary Figure 8: Expression of wild-type and mutant PLC $\gamma_2$  isozymes in the experiment shown in Figure 9A–9C.** Cells from one well each were analyzed by SDS-PAGE and immunoblotting using an antibody reactive against the c-Myc epitope present on wild-type and mutant PLC $\gamma_2$  or antibody reactive against  $\beta$ -actin (A–C) or antibody reactive against Rac2 (B).

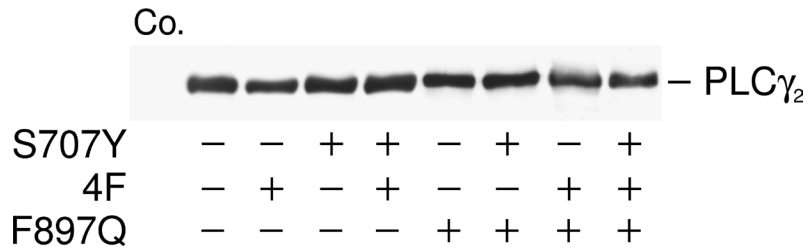

**Supplementary Figure 9: Expression of wild-type and mutant PLC $\gamma_2$  isoforms in the experiment shown in Figure 11.** Cells from one well each were analyzed by SDS-PAGE and immunoblotting using an antibody reactive against PLC $\gamma_2$ .

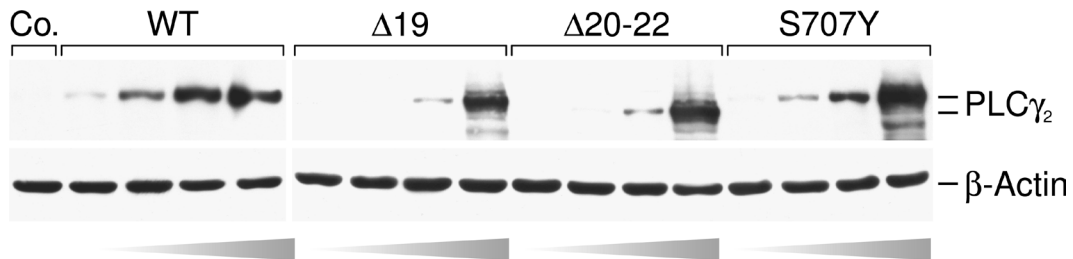

**Supplementary Figure 10: Expression of wild-type and mutant PLC $\gamma_2$  isoforms in the experiment shown in Figure 12.** Aliquots of the samples were subjected to SDS-PAGE and immunoblotting was performed using an antibody reactive against the c-Myc epitope present on wild-type and mutant PLC $\gamma_2$  or antibody reactive against  $\beta$ -actin.

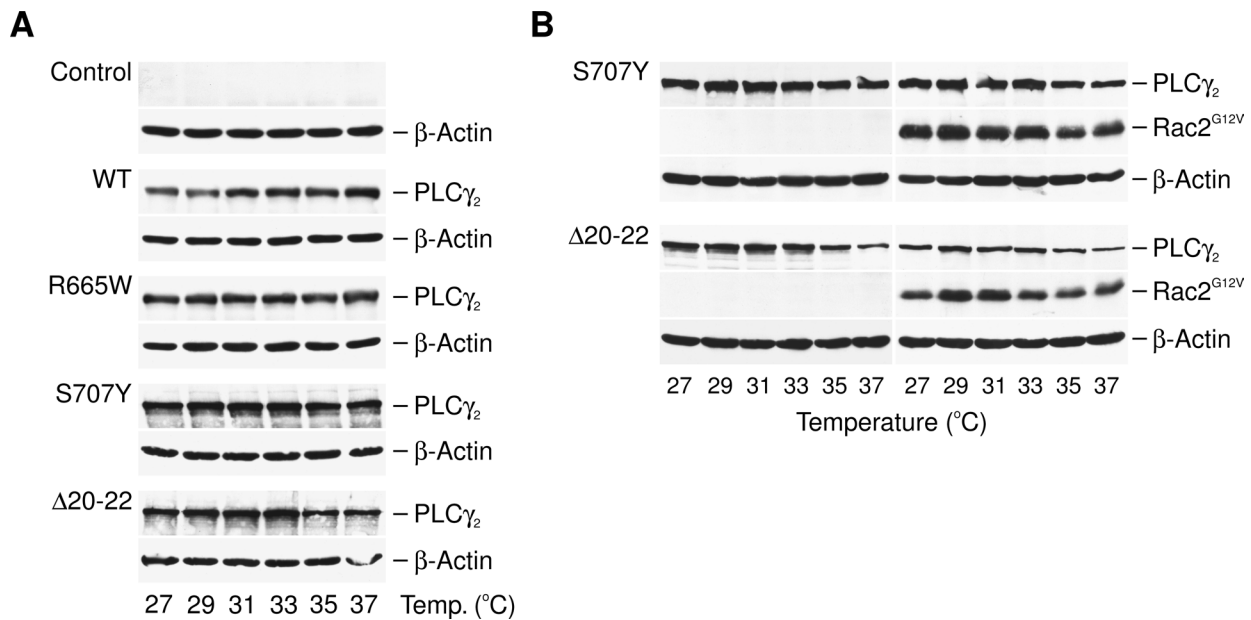

**Supplementary Figure 11: Expression of wild-type and mutant PLC $\gamma_2$  isoforms in the experiment shown in Figure 13.** Cells from one well each were analyzed by SDS-PAGE and immunoblotting using an antibody reactive against the c-Myc epitope present on wild-type and mutant PLC $\gamma_2$  or antibody reactive against  $\beta$ -actin (A) or antibody reactive against Rac2 (B).

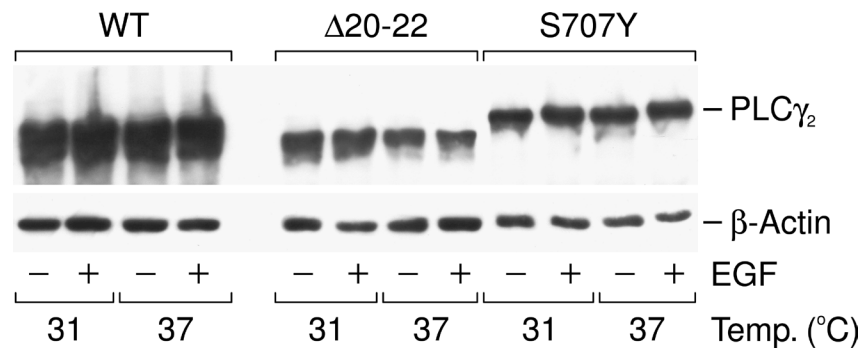

**Supplementary Figure 12: Expression of wild-type and mutant PLC $\gamma_2$  isozyms in the experiment shown in Figure 14.** Cells from one well each were analyzed by SDS-PAGE and immunoblotting using an antibody reactive against the c-Myc epitope present on wild-type and mutant PLC $\gamma_2$  or antibody reactive against  $\beta$ -actin.
